# Supplementary material
Source: PubMed Central journal article supplement (PMC5815373)
Supplement: NIHMS935193-supplement-Appendix.pdf [file NIHMS935193-supplement-Appendix.pdf]

# THE LANCET

## Diabetes & Endocrinology

### Supplementary appendix

This appendix formed part of the original submission and has been peer reviewed. We post it as supplied by the authors.

Supplement to: Baum A, Scarpa J, Bruzelius E, Tamler R, Basu S, Faghmous J. Targeting weight loss interventions to reduce cardiovascular complications of type 2 diabetes: a machine learning-based post-hoc analysis of heterogeneous treatment effects in the Look AHEAD trial. *Lancet Diabetes Endocrinol* 2017; published online July 12. [http://dx.doi.org/10.1016/S2213-8587\(17\)30176-6](http://dx.doi.org/10.1016/S2213-8587(17)30176-6).

## Appendix

### **I. Details on underlying functioning of Causal Forest method**

This paper applies recent advances in machine learning for causal inference to conduct a post-hoc analysis of a randomized controlled trial (RCT). The Action for Health in Diabetes (“Look AHEAD”) clinical trial we focus on was halted early on the basis of a futility analysis.<sup>1</sup> However, we hypothesized that the null average treatment effect may mask clinically- and policy-relevant heterogeneity.

Causally interpreting post-hoc analyses of RCTs is challenging because investigators may test a large number hypotheses, but only report those with significant treatment effects. On the other hand, the small set of pre-specified hypotheses registered ex-ante by investigators may leave clinically useful relationships between interventions, outcomes, and subgroups undiscovered. Recognizing the limitations of conventional approaches to subgroup analyses, and the fact that many clinical trials will be underpowered to detect meaningful treatment variation, a number of newer approaches to identifying HTEs have been proposed.<sup>2</sup> These include a class of more data-driven predictive risk modeling tools such as Classification and Regression Trees (CART) which are typically most appropriate for early exploratory analyses.

#### ***Overview***

The post-hoc analysis method we employ, called causal forest, extends classical recursive partitioning methods (e.g. random forest) to identify causally relevant subgroups defined by interactions of many variables, a combinatorial task for which human intuition and expertise is poorly suited. The initial, and conceptually important, step is to randomly split the data into two independent halves, using the first partition for hypothesis generation/tree construction (training data) and preserving the remainder of the data for statistically valid inference (testing data). The method first identifies subgroups with similar treatment effects in the training data, then tests the most promising heterogeneous treatment effect (HTE) hypotheses on the testing data to mitigate multiple testing concerns.

#### ***Identification of subgroups using the training data***

To identify subgroups, we constructed an ensemble of causal trees<sup>3</sup>, a type of decision tree. Decision trees are especially well-suited for identifying subgroups because they produce a partition of the sample in which subgroups share similar predictions or classifications that is not limited by model specification assumptions (as compared to several other approaches, e.g.<sup>4</sup> and<sup>5</sup>). In each causal tree, half the sample is randomly selected and its covariate space is sequentially partitioned into subspaces. Each split minimizes variation in the average treatment effect  $\Delta y = \bar{y}_{treated} - \bar{y}_{control}$  within each subspace. A key output of each tree is the “variable importance” of each covariate, which reflects the covariate’s inclusion in and order (depth) within the tree. Because the structure of a single tree depends on the training data, different training data may yield vastly different trees. To account for the high variance in any given tree, an ensemble of trees (a “forest”) is often used. In this study, we constructed a forest of 1,000 trees and calculated the mean variable importance measure for 84 baseline covariates across the forest.

To generate testable HTE hypotheses from the results of the forest, we developed a heuristic to select the subgroups (leaves) most representative of the treatment effect heterogeneity identified by the forest. The heuristic had the following three criteria: (1) we identified trees split on covariates with the highest variable importance measures whose most important variable

was the covariate with the greatest variable importance measure across the forest; (2) from these trees, we identified the tree whose samples had the greatest variance in individualized treatment effects calculated by the causal forest, a surrogate of heterogeneity; (3) within this tree, each leaf with at least 10% of the total cohort sample size was considered for downstream analysis. This identifies a single tree with subgroups (“leaves”) that reflects the forest’s average output. Lastly, we prioritize HTE hypothesis testing on subgroups defined by the most important variables of the forest. These HTE hypotheses are tested on the half of the data that was preserved (testing data) when building this most representative tree.

### ***Estimating HTE using the testing data***

We tested two HTE hypotheses on the testing data. We calculated hazard ratios and 95% confidence intervals using likelihood-ratio tests from a Cox proportional-hazards regression, with a model containing terms for study-group assignment, a subgroup dummy, and their interaction. We additionally conducted robustness checks of the statistical significance of our findings using a bootstrapping procedure (**Figure A2**).

## **II. Exploratory analysis of mechanisms underlying heterogeneity**

We investigated potential mechanisms through which differential intervention response across subgroups may have operated. We analyzed whether there were differences between treated and control participants in intermediate outcomes (e.g. traditional CVD outcomes) and process indicators (e.g. for intervention compliance) within each subgroup identified in the main analysis as experiencing differential long-term benefit from the intervention.

Recall, Subgroup 1 (15% of the overall sample; baseline HbA1C < 6.8% and baseline SF-36 General Health < 48) experienced no long-term benefit in terms of CVD-related morbidity and mortality from the intervention, whereas the remaining participants (85% of the overall sample) did. Using the testing dataset, we separately plot for Subgroup 1 vs. all remaining participants the monthly trends in the difference across treated and control participants to intermediate outcomes (**Figure A3**). We note suggestive evidence of less benefit in Subgroup 1 vs. all remaining participants over the short-term for HbA1c and self-reported mental health and over the long-term for blood pressure, with no evidence of heterogeneity for weight and self-reported general health. **Table A2** compares mean intervention compliance indicators among treated participants in Subgroup 1 vs. all remaining treated participants. Participants in Subgroup 1 reported fewer total minutes of exercise and fewer mean minutes of exercise in the first six months of the intervention year ( $p < .05$ ) and the last six month of the intervention year ( $p < .01$ ), suggesting differential compliance with the exercise components of the intervention.

Based on these exploratory analyses, the differential long-term intervention response across participants in Subgroup 1 vs. all remaining participants may have been driven by greater intermediate improvement in HbA1c, self-reported mental health, and blood pressure among those not in Subgroup 1, as well as by poorer intervention compliance among those in Subgroup 1. This suggests that those participants with less to gain in terms of HbA1c improvement who also had greater behavioral barriers to compliance were less likely to experience a long-term benefit from the intervention. These are exploratory analyses and the findings should be interpreted cautiously. The existing literature indicates that changes to HbA1c do not predict cardiovascular outcomes, though emerging data from new drug studies suggests the potential for cardiovascular risk reduction from improved HbA1c.<sup>6</sup> Therefore, the

use of HbA1c in our risk prediction is not necessarily causal, but rather could potentially be serving as an effective proxy measure for other factors, such as adherence.

**Table A1.** 84 baseline predictors from four major categories.

| Number<br>(corresponds<br>to x-axis of<br>Fig A1) | Variable Name   | Variable Label                                             | Values                                    | Category |
|---------------------------------------------------|-----------------|------------------------------------------------------------|-------------------------------------------|----------|
| 1                                                 | DIABETES_FAMILY | Family history of diabetes                                 | Yes; No; Missing                          | History  |
| 2                                                 | CVDHIS          | History of CVD                                             | Yes; No; Missing                          | History  |
| 3                                                 | diab_dur        | Self-Reported Duration of Diabetes (yrs)                   | numeric                                   | History  |
| 4                                                 | met_syn_tot     | Number of Metabolic syndrome criteria met                  | numeric [1,5]                             | History  |
| 5                                                 | MHAMP           | Ever had amputation of feet or legs                        | Yes; No; Missing                          | History  |
| 6                                                 | MHANG           | PTCA                                                       | Yes; No; Missing                          | History  |
| 7                                                 | MHAPNEA         | Ever have sleep apnea                                      | Yes; No; Missing                          | History  |
| 8                                                 | MHARTH          | Ever had arthritis                                         | Yes; No; Missing                          | History  |
| 9                                                 | MHBURN          | Burning in legs/feet                                       | Yes; No; Missing                          | History  |
| 10                                                | MHCABG          | CABG                                                       | Yes; No; Missing                          | History  |
| 11                                                | MHCEND          | Carotid endarterectomy                                     | Yes; No; Missing                          | History  |
| 12                                                | MHCRAMPS        | Muscle cramps in legs/feet                                 | Yes; No; Missing                          | History  |
| 13                                                | MHDRY           | Skin on feet so dry it cracks open                         | Yes; No; Missing                          | History  |
| 14                                                | MHEMPH          | Ever had emphysema                                         | Yes; No; Missing                          | History  |
| 15                                                | MHHURT          | Legs hurt when walk                                        | Yes; No; Missing                          | History  |
| 16                                                | MHKDIS          | Kidney disease                                             | Yes; No; Missing                          | History  |
| 17                                                | MHLOUD          | How loud is snoring                                        | Only slightly louder than heavy breathing | History  |
| 18                                                | MHLOWER         | Angioplasty of Lower extremity artery                      | Yes; No; Missing                          | History  |
| 19                                                | MHMI            | Myocardial Infarction (clinical)                           | Yes; No; Missing                          | History  |
| 20                                                | MHNEUR          | Had diabetic neuropathy                                    | Yes; No; Missing                          | History  |
| 21                                                | MHNUMB          | Legs/feet numb                                             | Yes; No; Missing                          | History  |
| 22                                                | MHOFTEN         | How often do you stop breathing during sleep               | Sometimes (up to 2 nights a week)         | History  |
| 23                                                | MHPRCK          | Prickling feelings in legs/feet                            | Yes; No; Missing                          | History  |
| 24                                                | MHRETINA        | Ever been told that diabetes affected the back of your eye | Yes; No; Missing                          | History  |
| 25                                                | MHSENS          | Feet too sensitive to touch                                | Yes; No; Missing                          | History  |
| 26                                                | MHSLEEPY        | How often do you feel overly sleepy during day             | Never or rarely (1 day/month or less)     | History  |
| 27                                                | MHSNFREQ        | How often do you snore                                     | Do not snore any more                     | History  |
| 28                                                | MHSNORE         | Ever snored                                                | Yes; No; Don't Know; Missing              | History  |
| 29                                                | MHSORE          | Ever had open foot sore                                    | Yes; No; Missing                          | History  |
| 30                                                | MHSTPBTH        | Ever stop breathing during sleep                           | Yes; No; Don't Know; Missing              | History  |
| 31                                                | MHSTROKE        | Stroke                                                     | Yes; No; Missing                          | History  |
| 32                                                | MHTELL          | Tell hot from cold water                                   | Yes; No; Missing                          | History  |

|    |                |                                               |                                                                                                                                                                                                                    |                  |
|----|----------------|-----------------------------------------------|--------------------------------------------------------------------------------------------------------------------------------------------------------------------------------------------------------------------|------------------|
| 33 | MHTOUCH        | Hurt when bed covers touch skin               | Yes; No; Missing                                                                                                                                                                                                   | History          |
| 34 | MHWALK         | Sense feet when you walk                      | Yes; No; Missing                                                                                                                                                                                                   | History          |
| 35 | MHWEAK         | Feel weak all over                            | Yes; No; Missing                                                                                                                                                                                                   | History          |
| 36 | MHWORSE        | Symptoms worse at night                       | Yes; No; Missing                                                                                                                                                                                                   | History          |
| 37 | glucosemgDL    | Fasting glucose (mgdl)                        | numeric                                                                                                                                                                                                            | Molecular Traits |
| 38 | hba1cpct       | Hemoglobin A1c %                              | numeric                                                                                                                                                                                                            | Molecular Traits |
| 39 | hdlchlmgDL     | HDL cholesterol (mgdl)                        | numeric                                                                                                                                                                                                            | Molecular Traits |
| 40 | ldlchlmgDL     | LDL cholesterol (mgdl)                        | numeric                                                                                                                                                                                                            | Molecular Traits |
| 41 | screatmgDL     | Serum Creatinine (mg/dL)                      | numeric                                                                                                                                                                                                            | Molecular Traits |
| 42 | TrigmgDL       | Triglycerides (mgdl)                          | numeric                                                                                                                                                                                                            | Molecular Traits |
| 43 | ualbmgDL       | Urine albumin (mg/dL)                         | numeric                                                                                                                                                                                                            | Molecular Traits |
| 44 | ucreatmgDL     | Urine creatinine (mg/dL)                      | numeric                                                                                                                                                                                                            | Molecular Traits |
| 45 | avgabi         | Ankle Brachial Index (average)                | numeric                                                                                                                                                                                                            | Molecular Traits |
| 46 | baselinewgt_kg | Computed Mean Weight in Kg                    | numeric                                                                                                                                                                                                            | Molecular Traits |
| 47 | bmi            | Calculated BMI (SAS)                          | numeric                                                                                                                                                                                                            | Molecular Traits |
| 48 | bssbp_mean     | Computed Mean Systolic Blood Pressure         | numeric                                                                                                                                                                                                            | Molecular Traits |
| 49 | eshgt_mean     | Computed Mean Height in Cm                    | numeric                                                                                                                                                                                                            | Molecular Traits |
| 50 | prob1yr_adj    | Adjusted Framingham Risk at One Year          | numeric                                                                                                                                                                                                            | Molecular Traits |
| 51 | psothmd        | Other Diabetes Meds (at Screening)            | Yes; No; Missing                                                                                                                                                                                                   | Molecular Traits |
| 52 | RHOVCNT        | Do you still have both ovaries, one, or none? | None; Only one; Both; None; Not sure; Missing                                                                                                                                                                      | Molecular Traits |
| 53 | RHPSTOP        | How did your periods stop?                    | Naturally; By Surgery; Other; Missing                                                                                                                                                                              | Molecular Traits |
| 54 | FEMALE         | Female                                        | Yes; No                                                                                                                                                                                                            | Sociodemographic |
| 55 | RACEVAR        | Race/Ethnicity                                | African American/Black (not Hispanic)                                                                                                                                                                              | Sociodemographic |
| 56 | age            | Age from Screening A or Prescreen             | numeric                                                                                                                                                                                                            | Sociodemographic |
| 57 | SDESTAT        | Unemployed or laid off                        | Yes; No; Missing                                                                                                                                                                                                   | Sociodemographic |
| 58 | SDHOUSE        | Keeping house or raising children full-time   | Yes; No; Missing                                                                                                                                                                                                   | Sociodemographic |
| 59 | SDINC1         | Money Earned in past 12 months                | Under \$10,000; \$10,000-\$19,999; \$20,000-\$29,999; \$30,000-\$39,999; \$40,000-\$49,999; \$50,000-\$59,999; \$60,000-\$69,999; \$70,000-\$79,999; >\$80,000; Missing                                            | Sociodemographic |
| 60 | SDINC2         | Net worth                                     | 0-\$500; \$501-\$1,000; \$1,001-\$5,000; \$5,001-\$10,000; \$10,001-\$25,000; \$25,001-\$50,000; \$50,001-\$100,000; \$100,001-\$250,000; \$250,001-\$500,000; \$500,001-\$1,000,000; \$1,000,001 or more; Missing | Sociodemographic |
| 61 | SDLOOKWRK      | Looking for work                              | Yes; No; Missing                                                                                                                                                                                                   | Sociodemographic |
| 62 | SDMARSTAT      | Marital Status                                | Divorced                                                                                                                                                                                                           | Sociodemographic |

|    |               |                                                                            |                               |                  |
|----|---------------|----------------------------------------------------------------------------|-------------------------------|------------------|
| 63 | SDSTUDENT     | Full or part-time student                                                  | Yes; No; Missing              | Sociodemographic |
| 64 | SDUSUAL       | Source of care                                                             | Community health center       | Sociodemographic |
| 65 | SDWORKFT      | Working full time for pay                                                  | Yes; No; Missing              | Sociodemographic |
| 66 | SDWORKPT      | Working part-time for pay                                                  | Yes; No; Missing              | Sociodemographic |
| 67 | SMOKING       | Smoking status                                                             | Never; Past; Present; Missing | Behavior         |
| 68 | total_alcohol | Total alcohol consumption (oz/wk) (sum of beer, wine, and liquor per week) | numeric                       | Behavior         |
| 69 | BINGE_EAT     | Binge eating                                                               | Yes; No; Missing              | Behavior         |
| 70 | ACR           | Albumin-Creatinine Ratio                                                   | numeric                       | Behavior         |
| 71 | genhlth       | SF-36 General Health                                                       | numeric                       | Behavior         |
| 72 | ht            | SF-36 Reported Health Transition                                           | numeric                       | Behavior         |
| 73 | mcs           | SF-36 Mental Component Summary                                             | numeric                       | Behavior         |
| 74 | mentalhlth    | SF-36 Mental Health                                                        | numeric                       | Behavior         |
| 75 | pain          | SF-36 Bodily Pain                                                          | numeric                       | Behavior         |
| 76 | pcs           | SF-36 Physical Component Summary                                           | numeric                       | Behavior         |
| 77 | phyfunc       | SF-36 Physical Functioning                                                 | numeric                       | Behavior         |
| 78 | roleemot      | SF-36 Role-Emotional                                                       | numeric                       | Behavior         |
| 79 | rolephy       | SF-36 Role-Physical                                                        | numeric                       | Behavior         |
| 80 | socialfunc    | SF-36 Social Functioning                                                   | numeric                       | Behavior         |
| 81 | vitality      | SF-36 Vitality                                                             | numeric                       | Behavior         |
| 82 | EDEAT2HR      | Eat really big amount in short time?                                       | Yes; No; Missing              | Behavior         |
| 83 | EDEAT6MO      | Eat really big amount of food?                                             | Yes; No; Missing              | Behavior         |
| 84 | bd_t          | Beck Total score (entered at clinic)                                       | numeric                       | Behavior         |

**Table A2.** Comparison of intervention compliance indicators for “Subgroup 1” (baseline HbA1C < 6.8% and baseline SF-36 General Health < 48) and Remaining Participants

|                                        | <b>Subgroup 1</b> | <b>Remaining Participants</b> | <b>Difference</b> |
|----------------------------------------|-------------------|-------------------------------|-------------------|
| <b>Months 0 – 6</b>                    |                   |                               |                   |
| Number of sessions attended            | 22.8              | 22.5                          | 0.657             |
| Percentage of expected visits attended | 91.5              | 89.9                          | 3.032*            |
| Total minutes of exercise              | 3899.2            | 4465.9                        | -494.9**          |
| Total meal replacements                | 238.6             | 248.6                         | -6.999            |
| Mean minutes of exercise               | 149.6             | 171.5                         | -19.11**          |
| Mean meal replacements                 | 9.5               | 9.9                           | -0.297            |
| <b>Months 7 – 12</b>                   |                   |                               |                   |
| Number of sessions attended            | 12.9              | 13.1                          | -0.0151           |
| Total minutes of exercise in months    | 3405.1            | 4381.4                        | -924.0***         |
| Total meal replacements in months      | 121.7             | 140.9                         | -19.25**          |
| Mean minutes of exercise in months     | 152.1             | 193.7                         | -39.12***         |
| Mean meal replacements in months       | 5.9               | 6.5                           | -0.611*           |
| Number of sessions                     | 35.5              | 35.3                          | 0.702             |
| <b>Months 0 – 12</b>                   |                   |                               |                   |
| Percentage of expected visits attended | 84.5              | 84.1                          | 1.671             |

\* p<0.05, \*\* p<0.01, \*\*\* p<0.001



**Table A3.** Comparison of intervention compliance indicators for “Subgroup 2” (baseline HbA1C < 6.8% and baseline SF-36 General Health >= 48) and Remaining Participants

|                                        | <b>Subgroup 2</b> | <b>Remaining Participants</b> | <b>Difference</b> |
|----------------------------------------|-------------------|-------------------------------|-------------------|
| <b>Months 0 – 6</b>                    |                   |                               |                   |
| Number of sessions attended            | 22.6              | 23.2                          | -0.5              |
| Percentage of expected visits attended | 90.8              | 93.2                          | -2.2              |
| Total minutes of exercise              | 4075.0            | 3731.7                        | 343.7             |
| Total meal replacements                | 241.1             | 239.5                         | 3.3               |
| Mean minutes of exercise               | 156.6             | 141.9                         | 14.3              |
| Mean meal replacements                 | 9.6               | 9.4                           | 0.2               |
| <b>Months 7 – 12</b>                   |                   |                               |                   |
| Number of sessions attended            | 12.9              | 13.3                          | -0.2              |
| Total minutes of exercise in months    | 3658.9            | 3418.6                        | 286.2             |
| Total meal replacements in months      | 126.1             | 125.9                         | 1.4               |
| Mean minutes of exercise in months     | 163.7             | 147.6                         | 17.9              |
| Mean meal replacements in months       | 6.1               | 5.9                           | 0.2               |
| Number of sessions                     | 35.3              | 36.4                          | -0.8              |
| <b>Months 0 – 12</b>                   |                   |                               |                   |
| Percentage of expected visits attended | 84.0              | 86.6                          | -1.9              |

\* p<0.05, \*\* p<0.01, \*\*\* p<0.001

**Table A4.** Baseline characteristics of Subgroup 1 and Remaining Participants across treated and control groups in the testing data

|                          | Subgroup 1 |         | Remaining Participants |         |
|--------------------------|------------|---------|------------------------|---------|
|                          | Treated    | Control | Treated                | Control |
| <b>Age</b>               | 60.04      | 60.73   | 58.46                  | 58.51   |
|                          | (6.63)     | (6.83)  | (6.71)                 | (6.59)  |
| <b>Female</b>            | 1.58       | 1.57    | 1.60                   | 1.60    |
|                          | (0.50)     | (0.50)  | (0.49)                 | (0.49)  |
| <b>Race</b>              | 3.25       | 3.34    | 3.19                   | 3.21    |
|                          | (1.19)     | (1.11)  | (1.19)                 | (1.17)  |
| <b>CVD History</b>       | 1.11       | 1.12    | 1.15                   | 1.14    |
|                          | (0.31)     | (0.33)  | (0.35)                 | (0.35)  |
| <b>Smoking</b>           | 2.51       | 2.53    | 2.55                   | 2.55    |
|                          | (0.55)     | (0.58)  | (0.59)                 | (0.57)  |
| <b>Diabetes duration</b> | 5.22       | 5.32    | 7.36                   | 7.38    |
|                          | (6.05)     | (6.25)  | (7.10)                 | (6.36)  |
| <b>Weight (kg)</b>       | 98.80      | 96.91   | 101.60                 | 102.30  |
|                          | (19.59)    | (17.31) | (19.85)                | (19.57) |
| <b>BMI</b>               | 34.86      | 34.56   | 36.16                  | 36.39   |
|                          | (6.08)     | (5.15)  | (6.01)                 | (6.02)  |
| <b>HbA1C</b>             | 6.23       | 6.22    | 7.54                   | 7.61    |
|                          | (0.40)     | (0.39)  | (1.12)                 | (1.16)  |
| <b>Systolic BP</b>       | 128.30     | 128.00  | 128.50                 | 130.30  |
|                          | (17.35)    | (16.96) | (17.07)                | (17.17) |
| <b>HDL</b>               | 45.17      | 43.99   | 43.06                  | 43.33   |
|                          | (12.17)    | (11.63) | (12.20)                | (11.72) |

|                             |          |          |          |          |
|-----------------------------|----------|----------|----------|----------|
| <b>LDL</b>                  | 111.50   | 112.90   | 113.20   | 111.90   |
|                             | (31.00)  | (28.47)  | (32.50)  | (31.91)  |
|                             |          |          |          |          |
| <b>Triglyceride (mg/dl)</b> | 165.30   | 163.60   | 190.80   | 183.20   |
|                             | (103.80) | (100.30) | (121.20) | (127.00) |
|                             |          |          |          |          |
| <b>Observations</b>         | 279      | 253      | 938      | 981      |

**Table A5.** Baseline characteristics of Subgroup 2 and Remaining Participants across treated and control groups in the testing data

|                          | Subgroup 2 |         | Remaining Participants |         |
|--------------------------|------------|---------|------------------------|---------|
|                          | Treated    | Control | Treated                | Control |
| <b>Age</b>               | 58.24      | 57.92   | 58.92                  | 59.15   |
|                          | (6.50)     | (6.40)  | (6.76)                 | (6.74)  |
| <b>Female</b>            | 1.53       | 1.64    | 1.60                   | 1.59    |
|                          | (0.50)     | (0.48)  | (0.49)                 | (0.49)  |
| <b>Race</b>              | 3.40       | 3.30    | 3.17                   | 3.23    |
|                          | (1.07)     | (1.13)  | (1.20)                 | (1.17)  |
| <b>CVD History</b>       | 1.15       | 1.09    | 1.14                   | 1.15    |
|                          | (0.36)     | (0.28)  | (0.34)                 | (0.35)  |
| <b>Smoking</b>           | 2.52       | 2.52    | 2.54                   | 2.55    |
|                          | (0.54)     | (0.58)  | (0.59)                 | (0.58)  |
| <b>Diabetes duration</b> | 5.76       | 5.36    | 7.05                   | 7.22    |
|                          | (7.74)     | (5.71)  | (6.78)                 | (6.46)  |
| <b>Weight (kg)</b>       | 106.00     | 104.70  | 100.10                 | 100.60  |
|                          | (19.65)    | (19.81) | (19.73)                | (19.09) |
| <b>BMI</b>               | 37.20      | 37.35   | 35.64                  | 35.78   |
|                          | (5.90)     | (6.39)  | (6.04)                 | (5.78)  |
| <b>HbA1C</b>             | 6.22       | 6.29    | 7.41                   | 7.50    |
|                          | (0.39)     | (0.35)  | (1.14)                 | (1.19)  |
| <b>Systolic BP</b>       | 127.10     | 129.00  | 128.70                 | 130.00  |
|                          | (16.64)    | (17.47) | (17.21)                | (17.09) |
| <b>HDL</b>               | 42.71      | 45.59   | 43.68                  | 43.11   |
|                          | (11.89)    | (12.18) | (12.27)                | (11.58) |

|                             |          |         |          |          |
|-----------------------------|----------|---------|----------|----------|
| <b>LDL</b>                  | 108.40   | 111.30  | 113.50   | 112.30   |
|                             | (33.26)  | (30.34) | (31.93)  | (31.38)  |
|                             |          |         |          |          |
| <b>Triglyceride (mg/dl)</b> | 187.70   | 158.10  | 184.50   | 182.70   |
|                             | (122.70) | (83.25) | (117.10) | (127.30) |
|                             |          |         |          |          |
| <b>Observations</b>         | 171      | 179     | 1,046    | 1,055    |

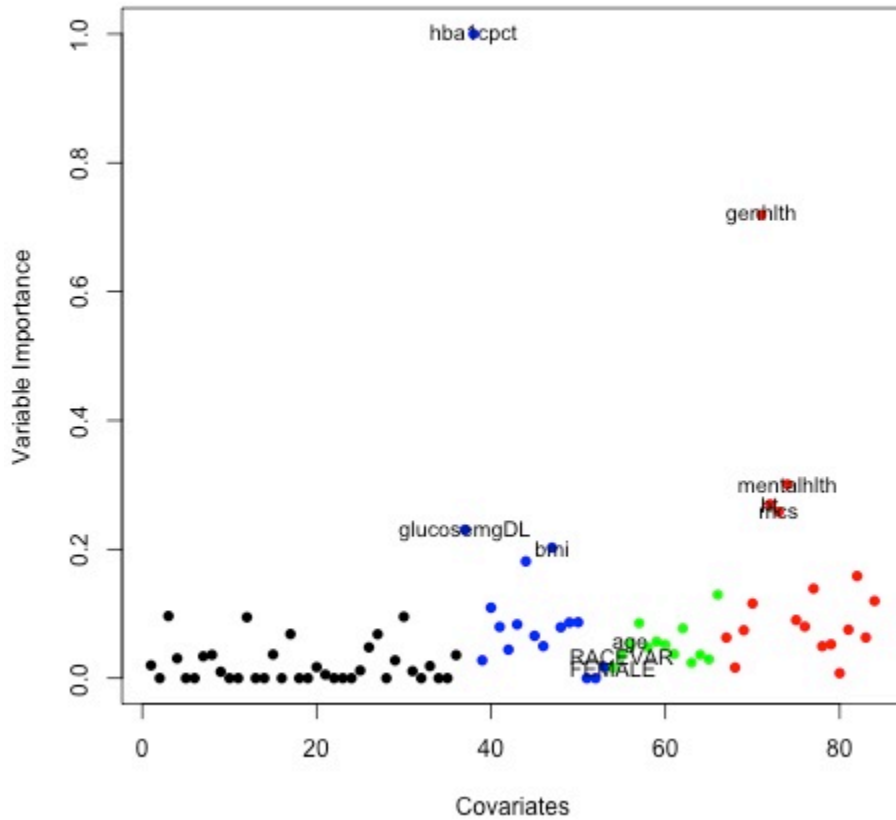

**Figure A1: Mean Normalized Variable Importance across the Causal Forest**

This figure shows the mean normalized variable importance for all covariates in the data. For ease of interpretation, we labeled covariates that were clear outliers, including HbA1C, self-reported general health (as reported on the SF-36), and others, as well as covariates commonly included in pre-analysis plans, including age, race, and gender. Medical history is labeled in black, laboratory values in blue, sociodemographic variables in green, and behavioral health variables in red.

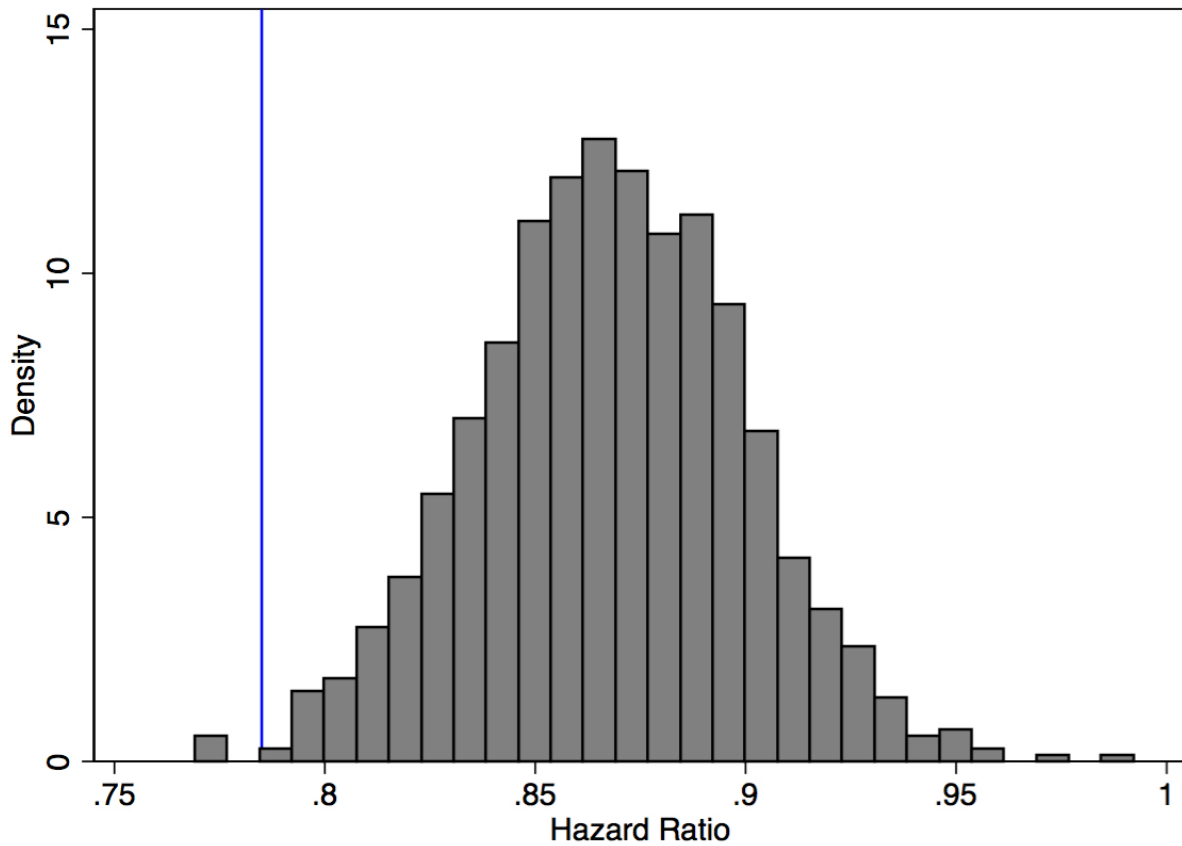

**Figure A2.** Results of bootstrapping procedure

Hazard ratios using likelihood-ratio tests from a Cox proportional-hazards regression across 1,000 replications of random subsamples of 84% of the testing data, with the blue line representing the hazard ratio result from a Cox proportional-hazards regression using the non-permuted data for the subgroup of participants not included in Subgroup 1 (the participants not in Subgroup 1 are those with both baseline HbA1C < 6.8% and baseline general health  $\geq$  48 or those with baseline HbA1C  $\geq$  6.8%).

Monthly trends in the difference across treated and control participants in intermediate outcomes for Subgroup 1 vs. Remaining Participants

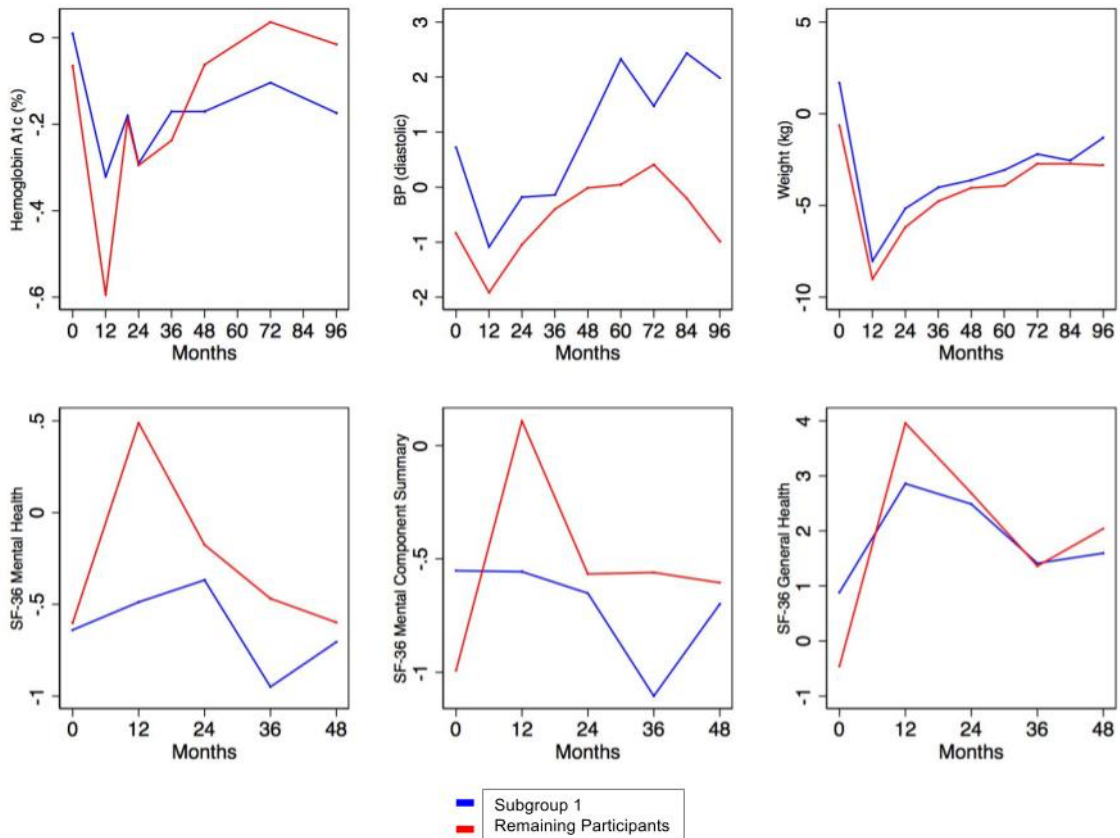

**Figure A3. Exploratory analysis of mechanisms underlying heterogeneity in Subgroup 1**  
 Using the testing dataset, we separately plot for “Subgroup 1” (baseline HbA1C < 6.8% and baseline SF-36 General Health < 48) vs. all the remaining participants the monthly trends in the difference across treated and control participants for HbA1c, blood pressure, weight, self-reported mental health, and self-reported general health. Recall, Subgroup 1 (15% of the overall sample) experienced no long-term benefit in terms of CVD-related morbidity and mortality from the intervention, whereas the remaining participants (85% of the overall sample) did.



Monthly trends in the difference across treated and control participants in intermediate outcomes for Subgroup 2 vs. Remaining Participants

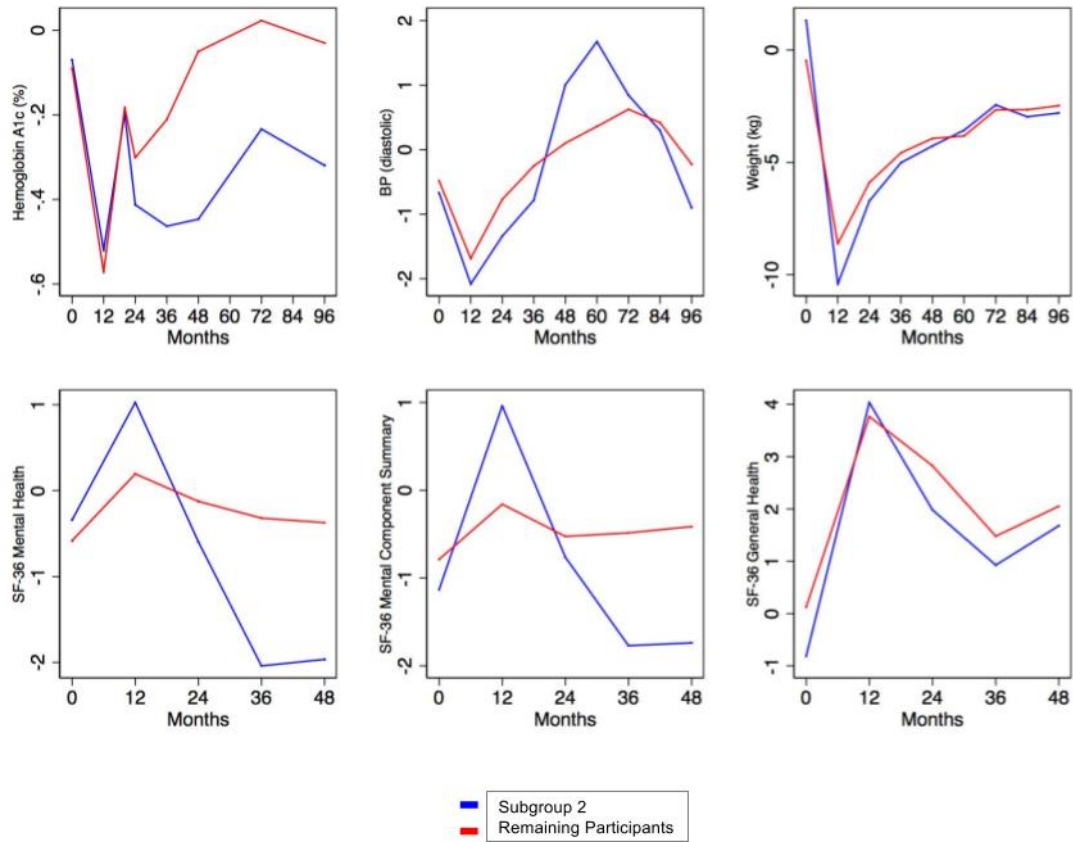

**Figure A4. Exploratory analysis of mechanisms underlying heterogeneity in Subgroup 2**

Using the testing dataset, we separately plot for “Subgroup 2” (baseline HbA1C < 6.8% and baseline SF-36 General Health >= 48) vs. all the remaining participants the monthly trends in the difference across treated and control participants for HbA1c, blood pressure, weight, self-reported mental health, and self-reported general health. Recall, Subgroup 2 experienced greater long-term benefit in terms of CVD-related morbidity and mortality from the intervention than remaining participants.

## References:

1. Look ARG, Wing RR, Bolin P, et al. Cardiovascular effects of intensive lifestyle intervention in type 2 diabetes. *N Engl J Med* 2013; **369**(2): 145-54.
2. Willke RJ, Zheng Z, Subedi P, Althin R, Mullins CD. From concepts, theory, and evidence of heterogeneity of treatment effects to methodological approaches: a primer. *BMC Med Res Methodol* 2012; **12**: 185.
3. Athey S, Imbens G. Recursive partitioning for heterogeneous causal effects. *Proc Natl Acad Sci U S A* 2016; **113**(27): 7353-60.
4. Breiman L, Friedman J, Stone CJ, RA O. Classification and regression trees. Boca Raton, FL: CRC press; 1984.
5. Breiman L. Random forests. *Machine Learning* 2001; **45**(1): 5-32.
6. Zinman B, Wanner C, Lachin JM, et al. Empagliflozin, Cardiovascular Outcomes, and Mortality in Type 2 Diabetes. *New England Journal of Medicine* 2015; **373**(22): 2117-28.
